# Supplementary material for: Nanostructured alkali cation incorporated δ-MnO2cathode materials for aqueous sodium-ion batteries
Source: Royal Society of Chemistry journal article supplement (doi:10.1039/c5ta00396b), 2015-01-01
Supplement: c5ta00396b1.pdf [file c5ta00396b1.pdf]

Supplementary Information

**Nanostructured alkali cations incorporated  $\delta$ -MnO<sub>2</sub> as cathode materials for  
aqueous sodium-ion batteries**

Yang Liu,<sup>†a,b</sup> Yun Qiao,<sup>†a,b</sup> Wuxing Zhang,<sup>a\*</sup> Huan Wang,<sup>a</sup> Kongyao Chen,<sup>a</sup>  
Huaping Zhu,<sup>a</sup> Zhen Li,<sup>a</sup> and Yunhui Huang<sup>a\*</sup>

<sup>a</sup> State Key Laboratory of Material Processing and Die & Mould Technology, School of Materials  
Science and Engineering, Huazhong University of Science and Technology, Wuhan 430074, China.

<sup>b</sup> School of Chemistry and Chemical Engineering, Henan Normal University, Xinxiang 453007, China

\* Corresponding author

E-mail: zhangwx@hust.edu.cn; huangyh@hust.edu.cn

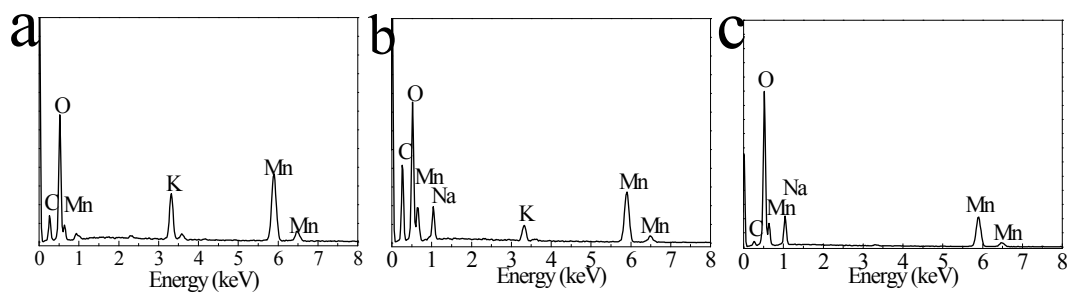

**Figure S1.** EDS spectra of (a) K- $\delta$ -MnO<sub>2</sub> (KMO), (b) K, Na- $\delta$ -MnO<sub>2</sub> (KNMO), and (c) Na- $\delta$ -MnO<sub>2</sub> (NMO).

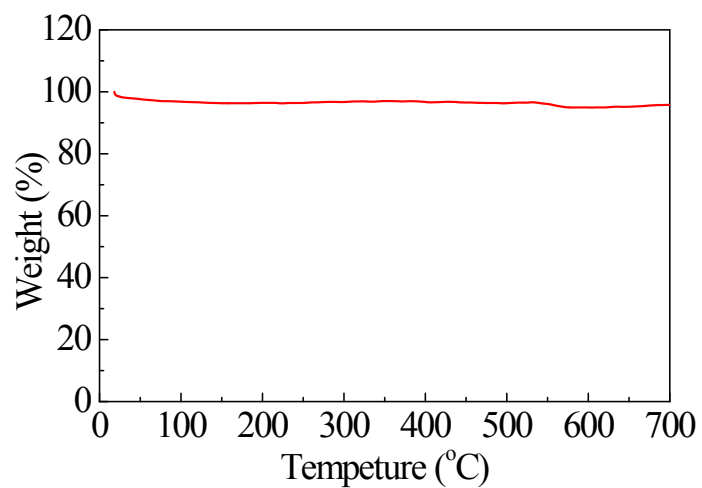

**Figure S2.** The TG curve of NMO from room temperature to 700 °C at a rate of 10 °C min<sup>-1</sup> in a flowing air.

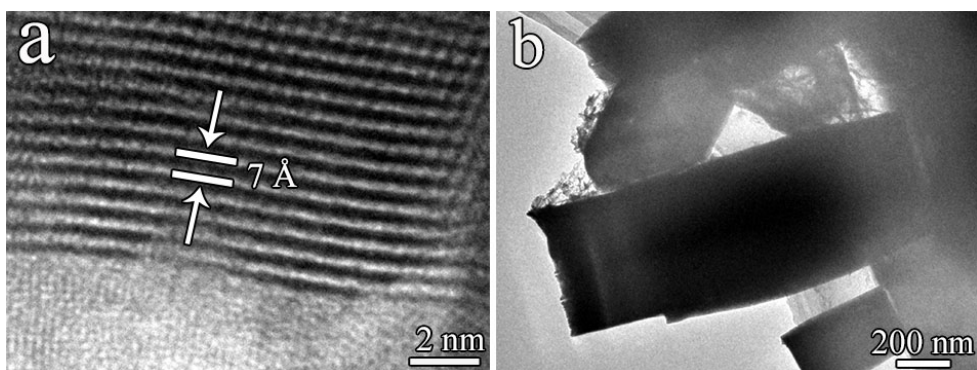

**Figure S3.** HRTEM, TEM images of (a) KNMO, (b) NMO.

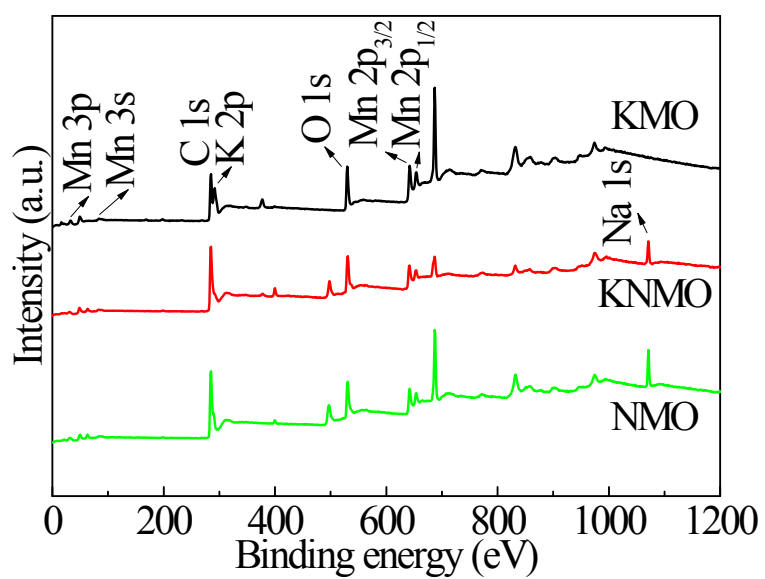

**Figure S4.** Survey XPS spectra for pristine samples.

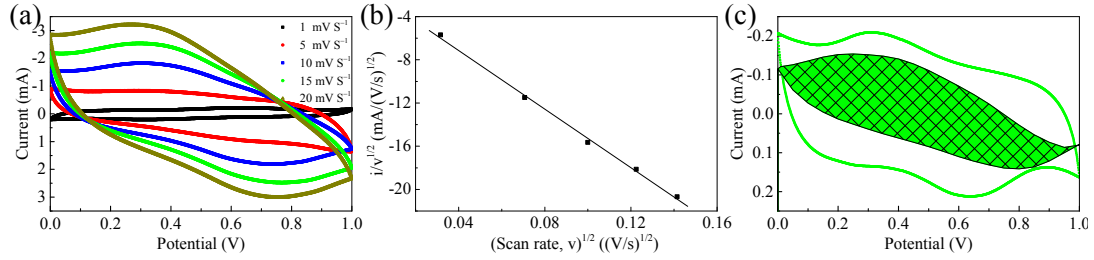

**Figure S5.** (a) CV curves of KNMO at different scan rates from 1 to 20 mV s<sup>-1</sup>; (b) the linear dependence of  $i/v^{1/2}$  on  $v^{1/2}$  ( $i$ : current;  $v$ : scan rate); (c) CV curve of KNMO at a scan rate of 1 mV s<sup>-1</sup> and the estimated capacitive contribution (shaded region).

The layered  $\delta$ -MnO<sub>2</sub> was investigated as supercapacitor electrode. The capacitive contribution was evaluated by using KNMO as SIB electrode. Figure S5a shows the CV curves of KNMO at different scan rates from 1 to 20 mV s<sup>-1</sup>. At a fixed potential, the overall current response is assumed to contain two contributions: surface capacitive effect and diffusion controlled insertion process, which is calculated as below<sup>1, 2</sup>:

$$i(V) = k_1v + k_2v^{1/2} \quad (1-1)$$

It can be written as

$$i(V)/v^{1/2} = k_1v^{1/2} + k_2 \quad (1-2)$$

where  $k_1v$  is the current contribution from surface capacitive effect, and  $k_2v^{1/2}$  is from the diffusion controlled insertion process. As shown in Figure S5b and equation (1-2), the linear dependence of  $i/v^{1/2}$  on the scan rate of  $v^{1/2}$  is used to determine the slope ( $k_1$ ) and the intercept ( $k_2$ ) at each fixed potential. This means that the capacitive effect can

be estimated at a certain voltage. Figure S5c clearly demonstrates the estimated capacitive contribution in the shaded region at a scan rate of  $1 \text{ mV s}^{-1}$ . On the basis of the enclosed area, the capacitive charge storage accounts for 49% of the overall charge storage.

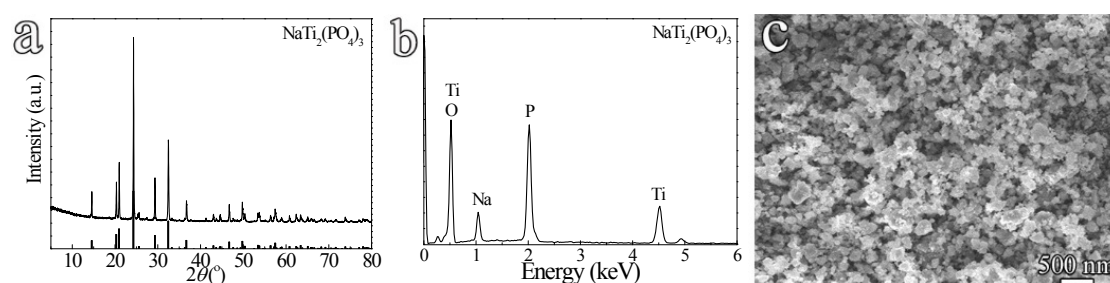

**Figure S6.** (a) XRD pattern, (b) EDS spectrum, and (c) FE-SEM image of  $\text{NaTi}_2(\text{PO}_4)_3$ .

As shown in Figure S6a, the XRD pattern reveals that it is well-defined NASICON structure (JCPDS 85-2265). The EDS result proves the coexistence of Na, Ti, P and O elements in the sample (Figure S6b). FE-SEM observation reflects that the  $\text{NaTi}_2(\text{PO}_4)_3$  sample is consisted with a large number of aggregated particles.

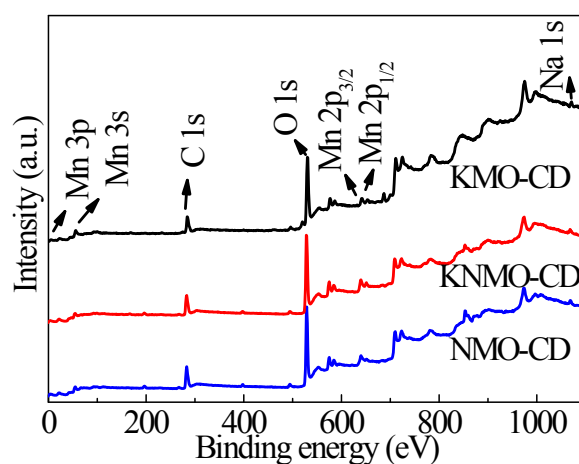

**Figure S7.** (a) XPS spectra for the three electrodes after charge/discharge cycle.

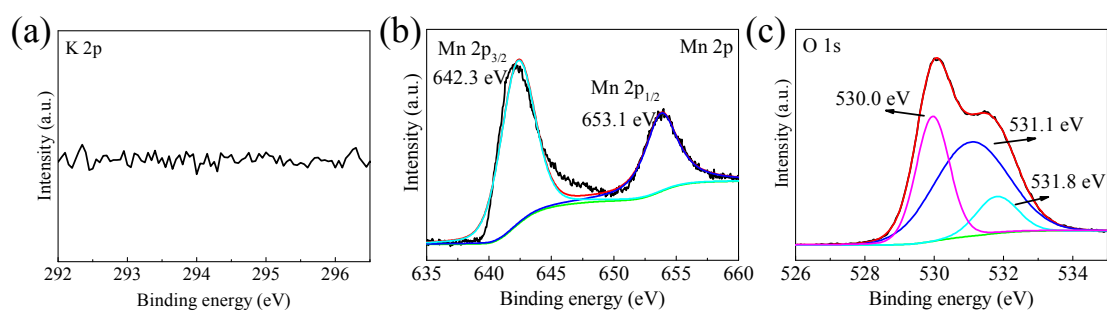

**Figure S8.** XPS spectra for etched electrode: high-resolution spectra of (a) K 2p, (b) Mn 2p and (c) O 1s.

## References

- 1 J. Wang, J. Polleux, J. Lim and B. Dunn, *J. Phys. Chem. C*, 2007, **111**, 14925-14931.
- 2 T. Brezesinski, J. Wang, J. Polleux, B. Dunn and S. H. Tolbert, *J. Am. Chem. Soc.*, 2009, **131**, 1802-1809.
